# Supplementary material
Source: Royal Society of Chemistry journal article supplement (doi:10.1039/d6tc00753h)
Supplement: d6tc00753h1.pdf [file d6tc00753h1.pdf]

## Supporting Information

### Enhancement of High-Temperature Piezoelectric Properties in V/Mn Co- Doped $\text{Sr}_2\text{Nb}_2\text{O}_7$ Ceramics

Fenghong Shao <sup>a,b</sup>, Chen Chen <sup>a</sup>, Xiang He <sup>a</sup>, Zhiguo Yi <sup>a,b,\*</sup>

<sup>a</sup> State Key Laboratory of High Performance Ceramics, Shanghai Institute of Ceramics, Chinese Academy of Sciences, Shanghai 200050, China

<sup>b</sup> Center of Materials Science and Optoelectronics Engineering, University of Chinese Academy of Sciences, Beijing 100049, China \*Email: zhiguo@mail.sic.ac.cn

KEYWORDS: perovskite-like layered structure materials, thermal stability, piezoelectric activity

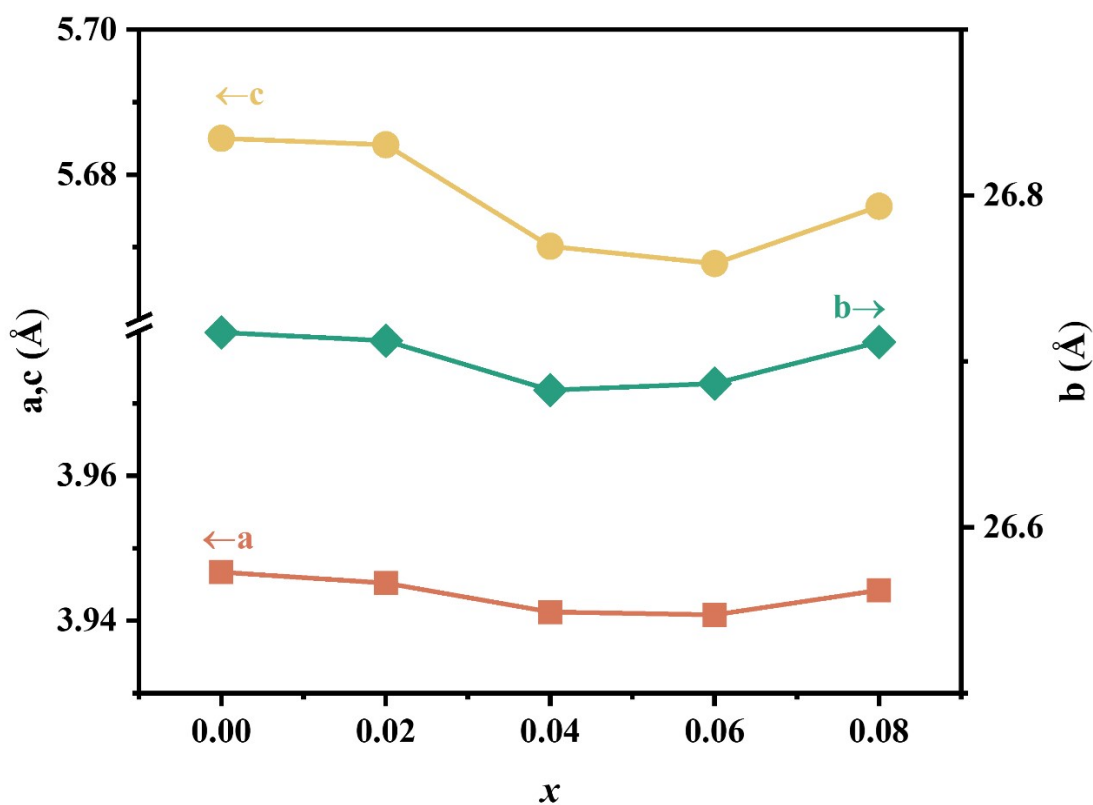

Fig. S1 variation in lattice constants (*a*, *b* and *c*) of SNVM<sub>x</sub> ceramics.

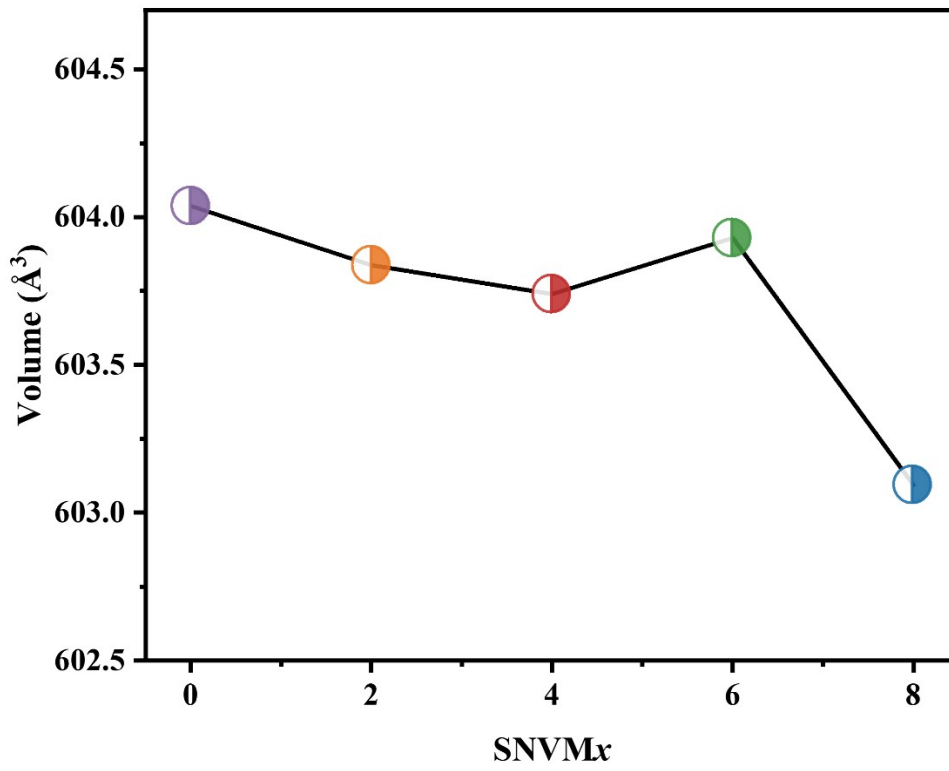

Fig. S2 Unit cell volume of SNVMx ceramics.

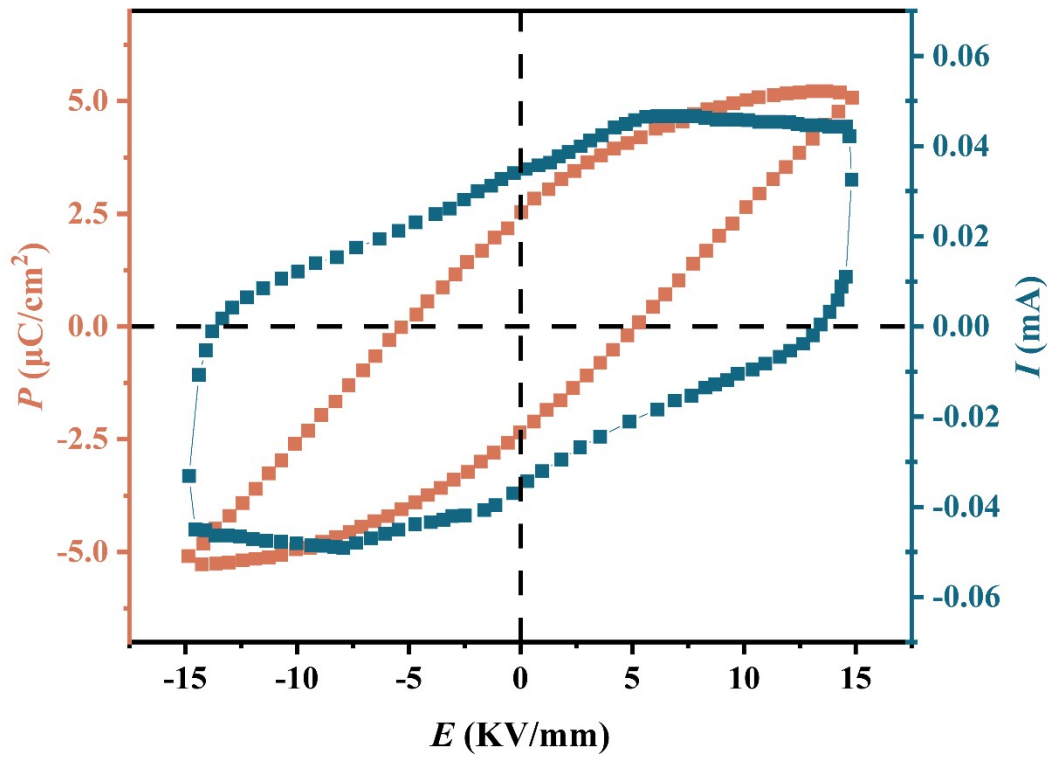

Fig. S3 P - E and I - E hysteresis loops of SNVM6.

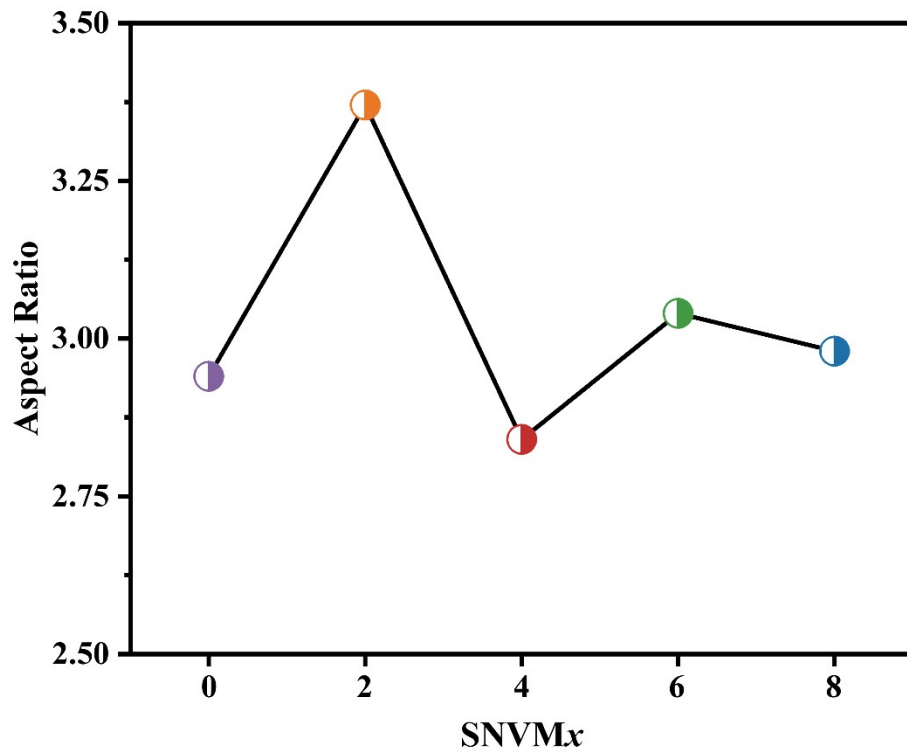

Fig. S4 The grain aspect ratios of SNVMx ceramics.

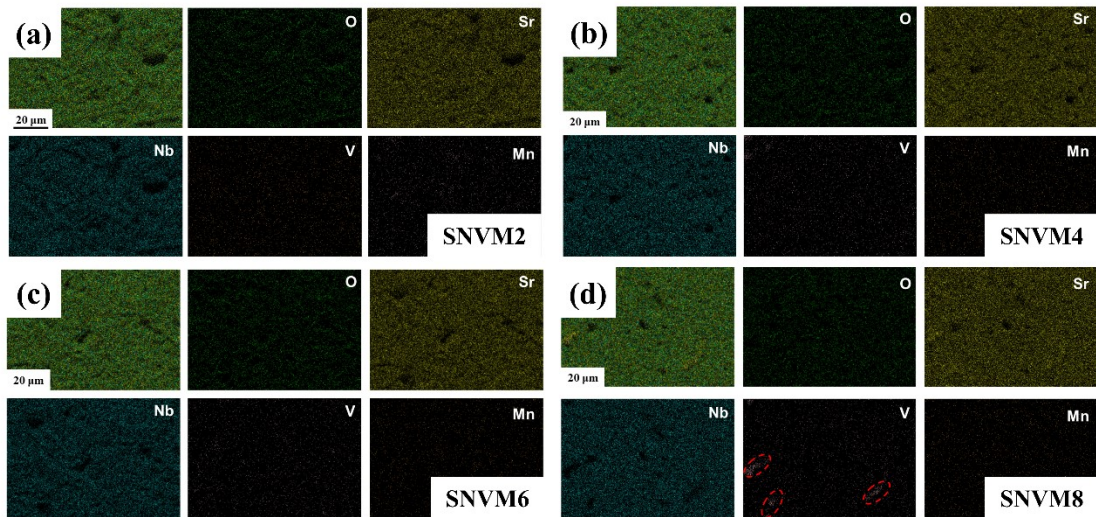

Fig. S5 Elemental mappings of SNVMx ceramics.

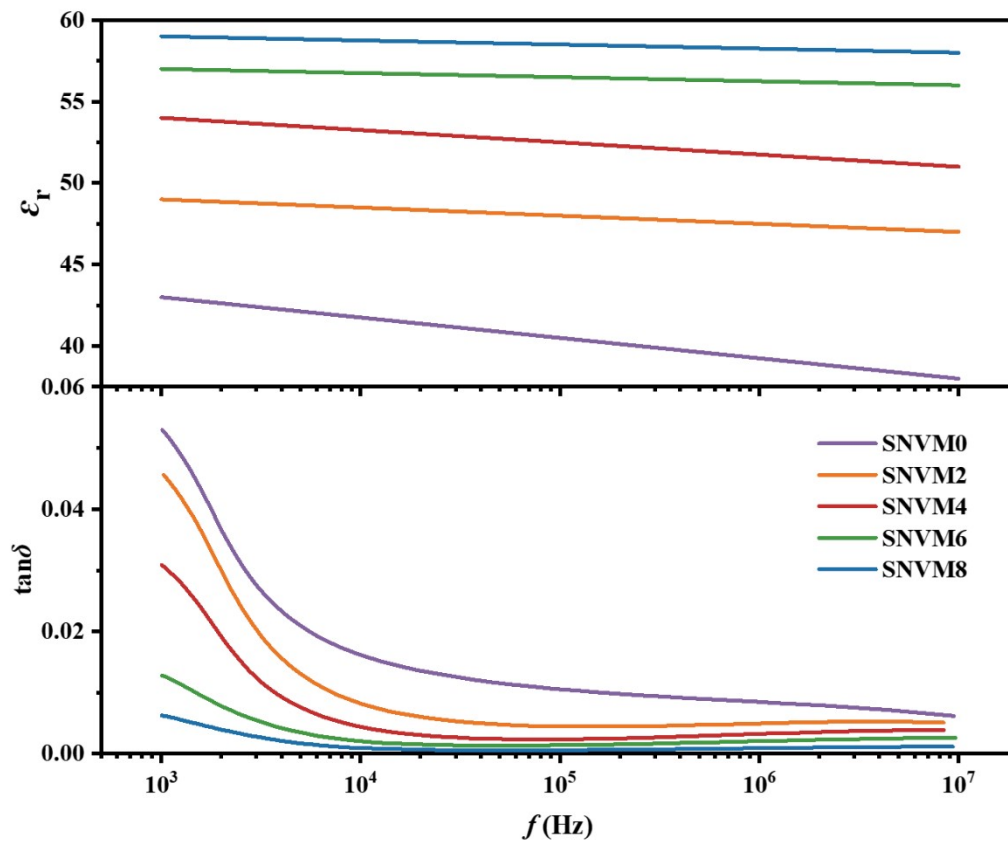

Fig. S6 Frequency dependence of dielectric constant and loss of SNVMx.

As shown in Fig. S4, the dielectric constant ( $\epsilon_r$ ) of SNVMx decreases only slightly over  $10^3$ - $10^7$  Hz, indicating weak frequency dispersion. Meanwhile,  $\epsilon_r$  shifts upward with increasing  $x$ , suggesting an enhanced effective polarization response and improved frequency stability after the V/Mn co-doping. The dielectric loss ( $\tan\delta$ ) is relatively high at low frequencies but drops rapidly as frequency increases and remains very low at high frequencies; importantly,  $\tan\delta$  decreases markedly with increasing  $x$ .

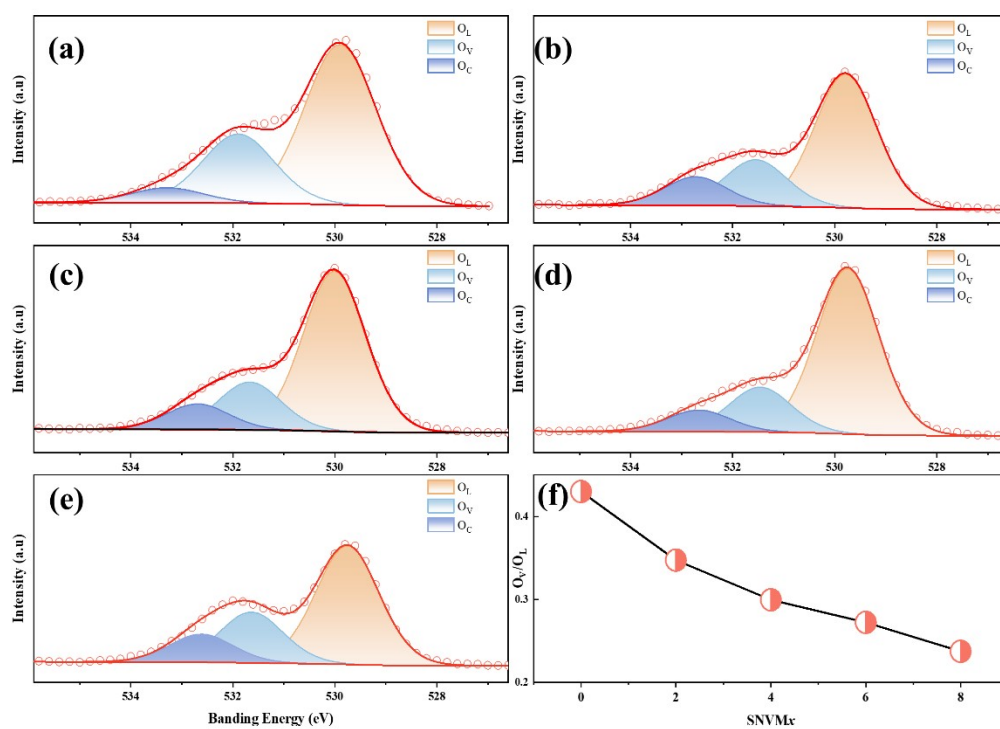

Fig. S7 The high-resolution XPS spectra of O1s for (a) SNVM0, (b) SNVM2, (c) SNVM4, (d) SNVM6, (e) SNVM8 ceramics and (f) Oxygen vacancy content of SNVMx ceramics.

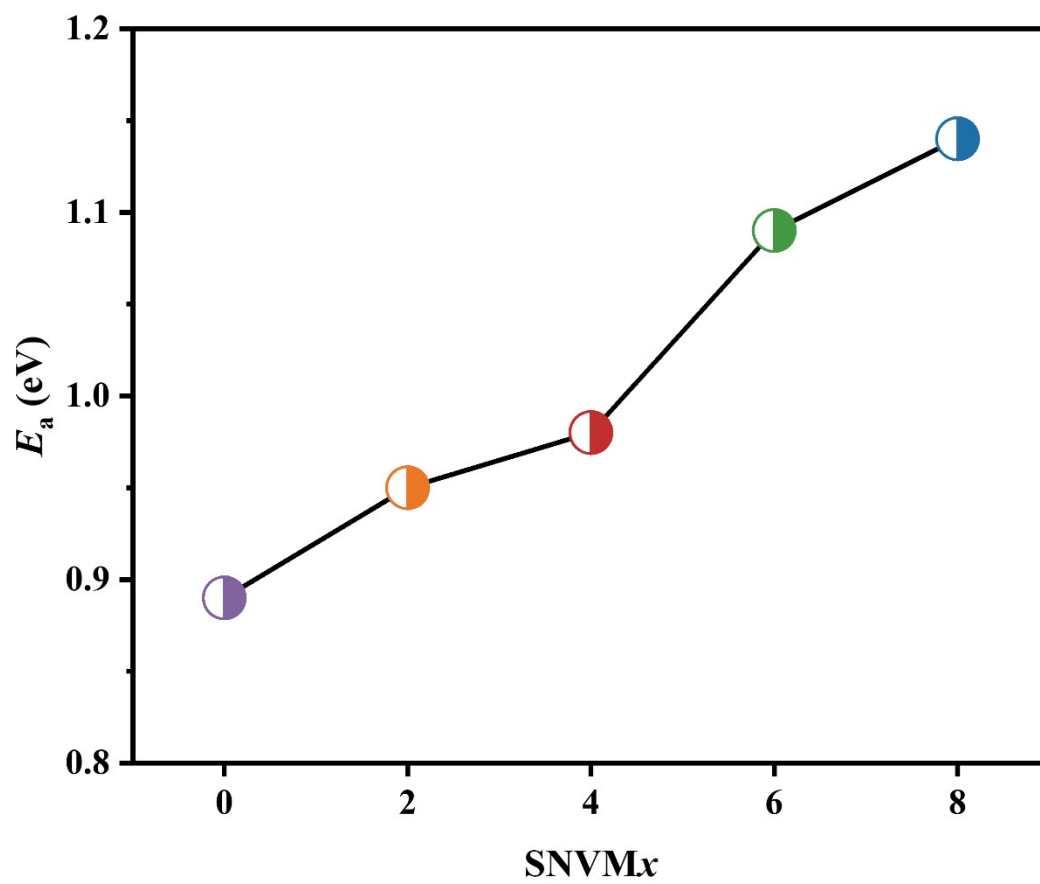

Fig. S8 Calculated  $E_a$  values for SNVM $x$  ceramics.
